# Supplementary material for: Phosphorylation of gH2AX as a novel prognostic biomarker for laryngoesophageal dysfunction-free survival
Source: PubMed Central journal article supplement (PMC5077972; doi:10.18632/oncotarget.9172), 2016-05-04
Supplement: oncotarget-07-31723-s001.pdf [file oncotarget-07-31723-s001.pdf]

# Phosphorylation of gH2AX as a novel prognostic biomarker for laryngoesophageal dysfunction-free survival

## Supplementary Material

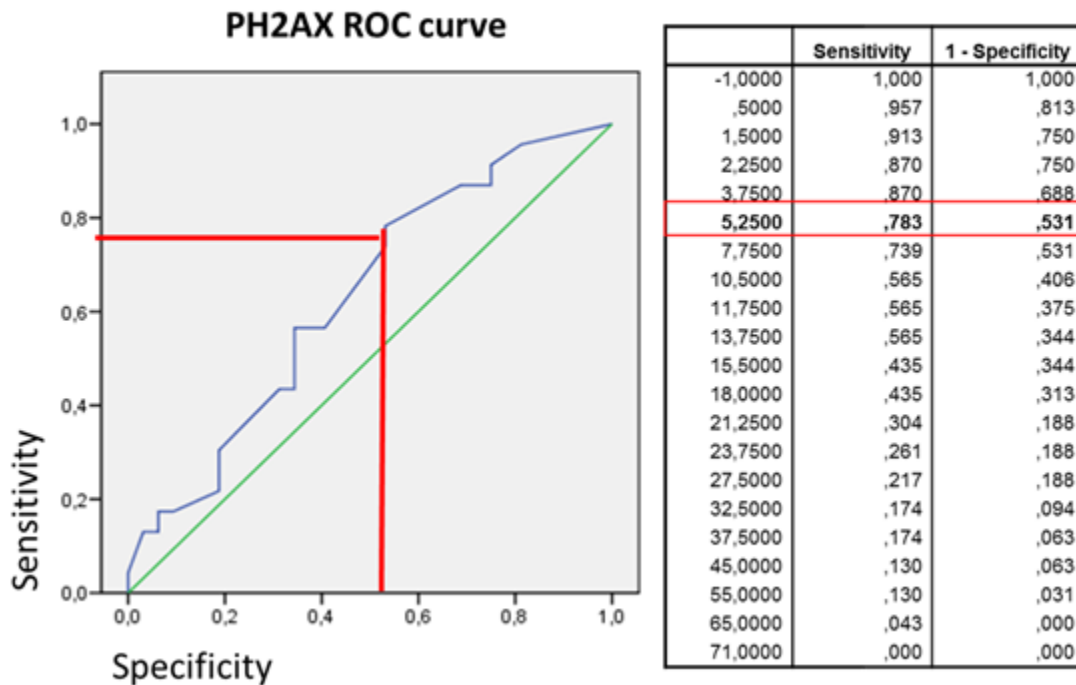

**Supplementary Figure 1.** ROC curve to determine the pH2AX cut-off that selects which is the best point connecting sensitivity and specificity. In the graph, it is shown and the dot of the curve closer to the left superior corner.
